# Supplementary material for: Ozone production and precursor emission from wildfires in Africa
Source: Royal Society of Chemistry journal article supplement (doi:10.1039/d1ea00041a), 2021-01-01
Supplement: d1ea00041a1.pdf [file d1ea00041a1.pdf]

## Supplementary information

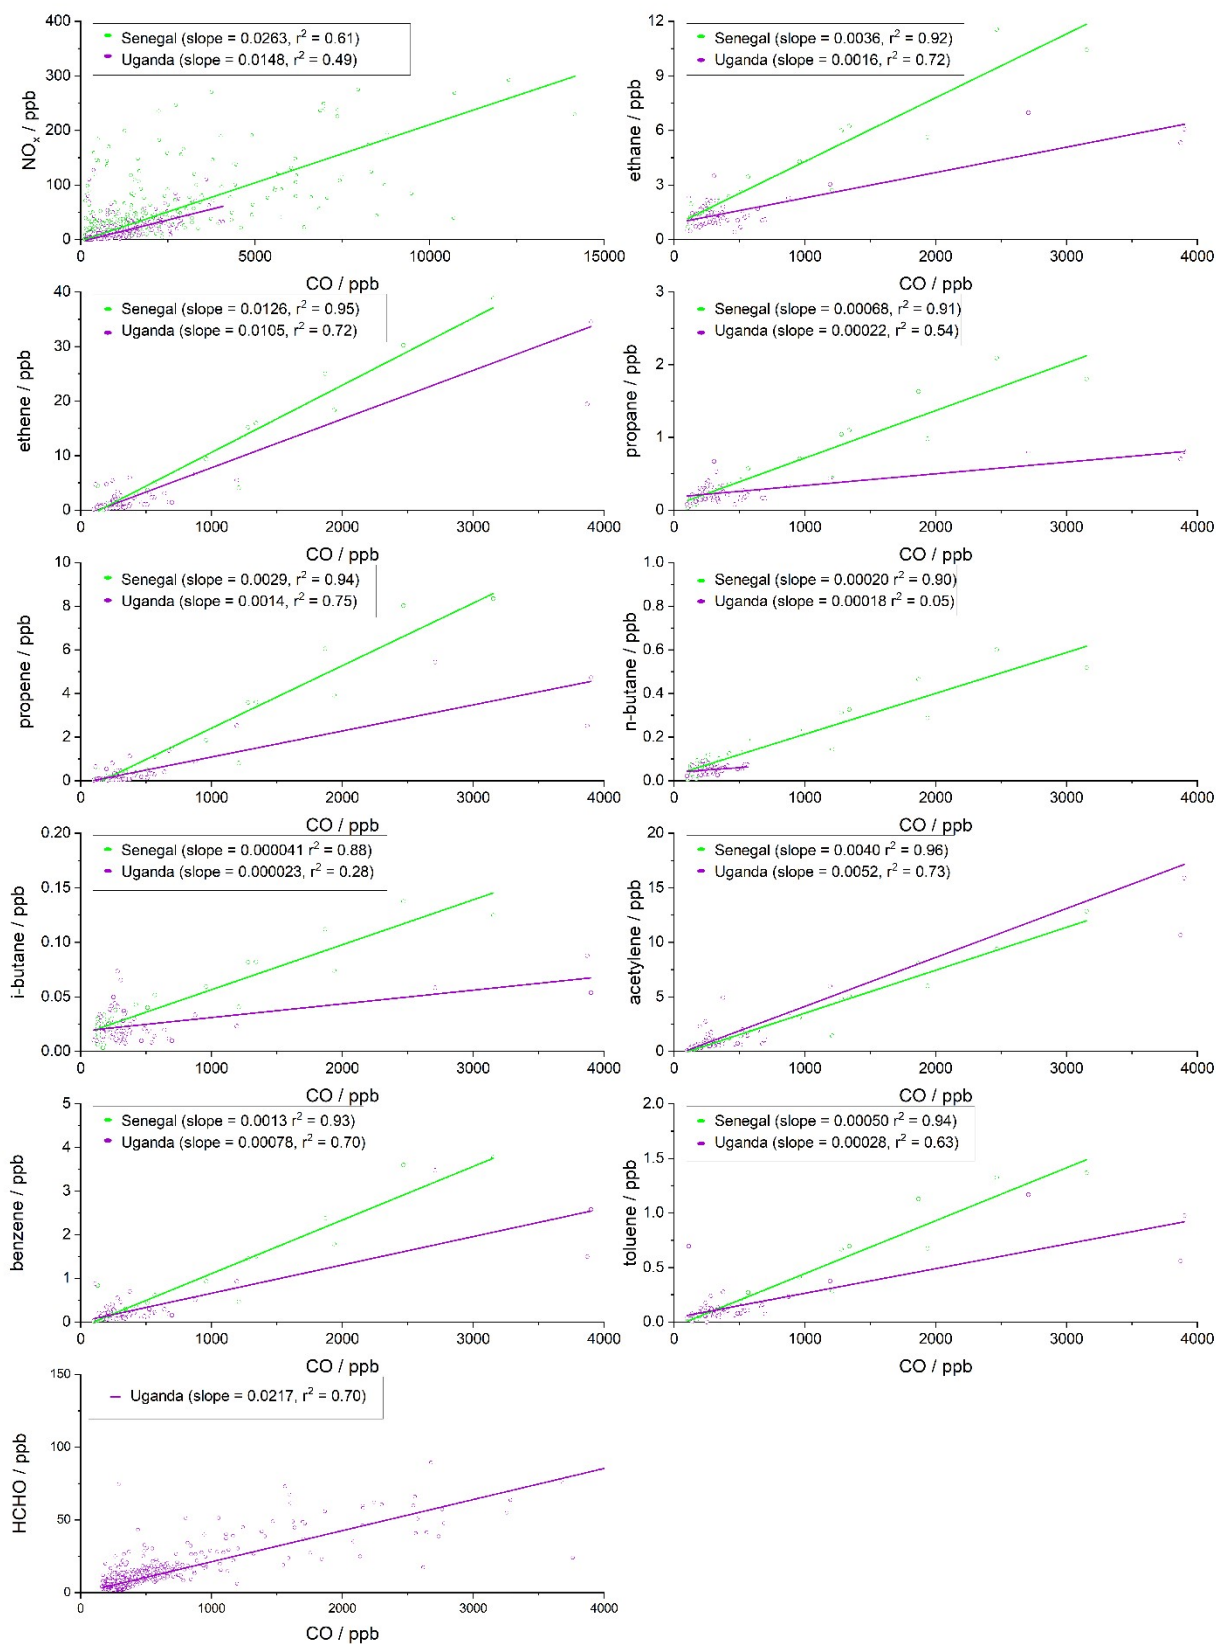

Figure S1:  $\text{NO}_x$  and selected VOCs plotted against CO for fires in Senegal (blue) and Uganda (orange).

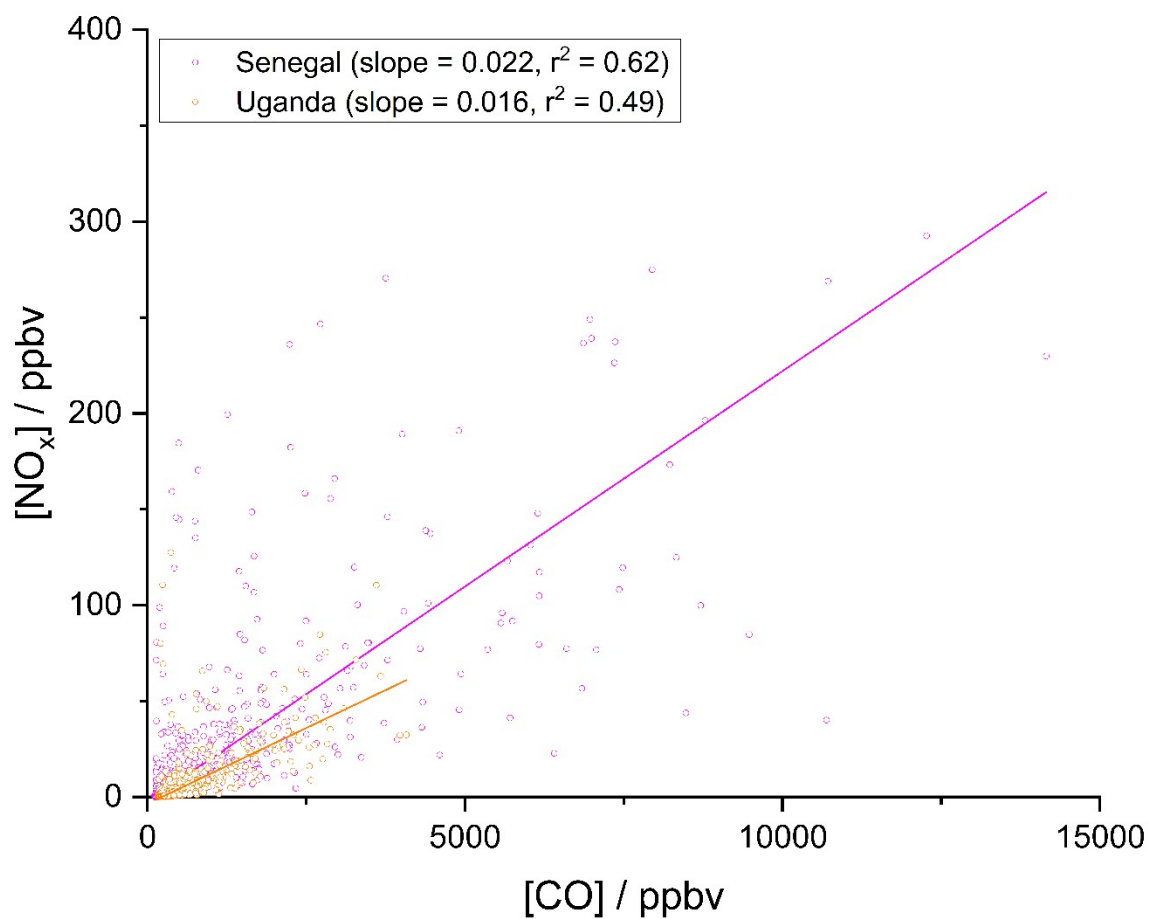

Figure S2: NO<sub>x</sub> plotted against total VOC for fires in Senegal (blue) and Uganda (orange).

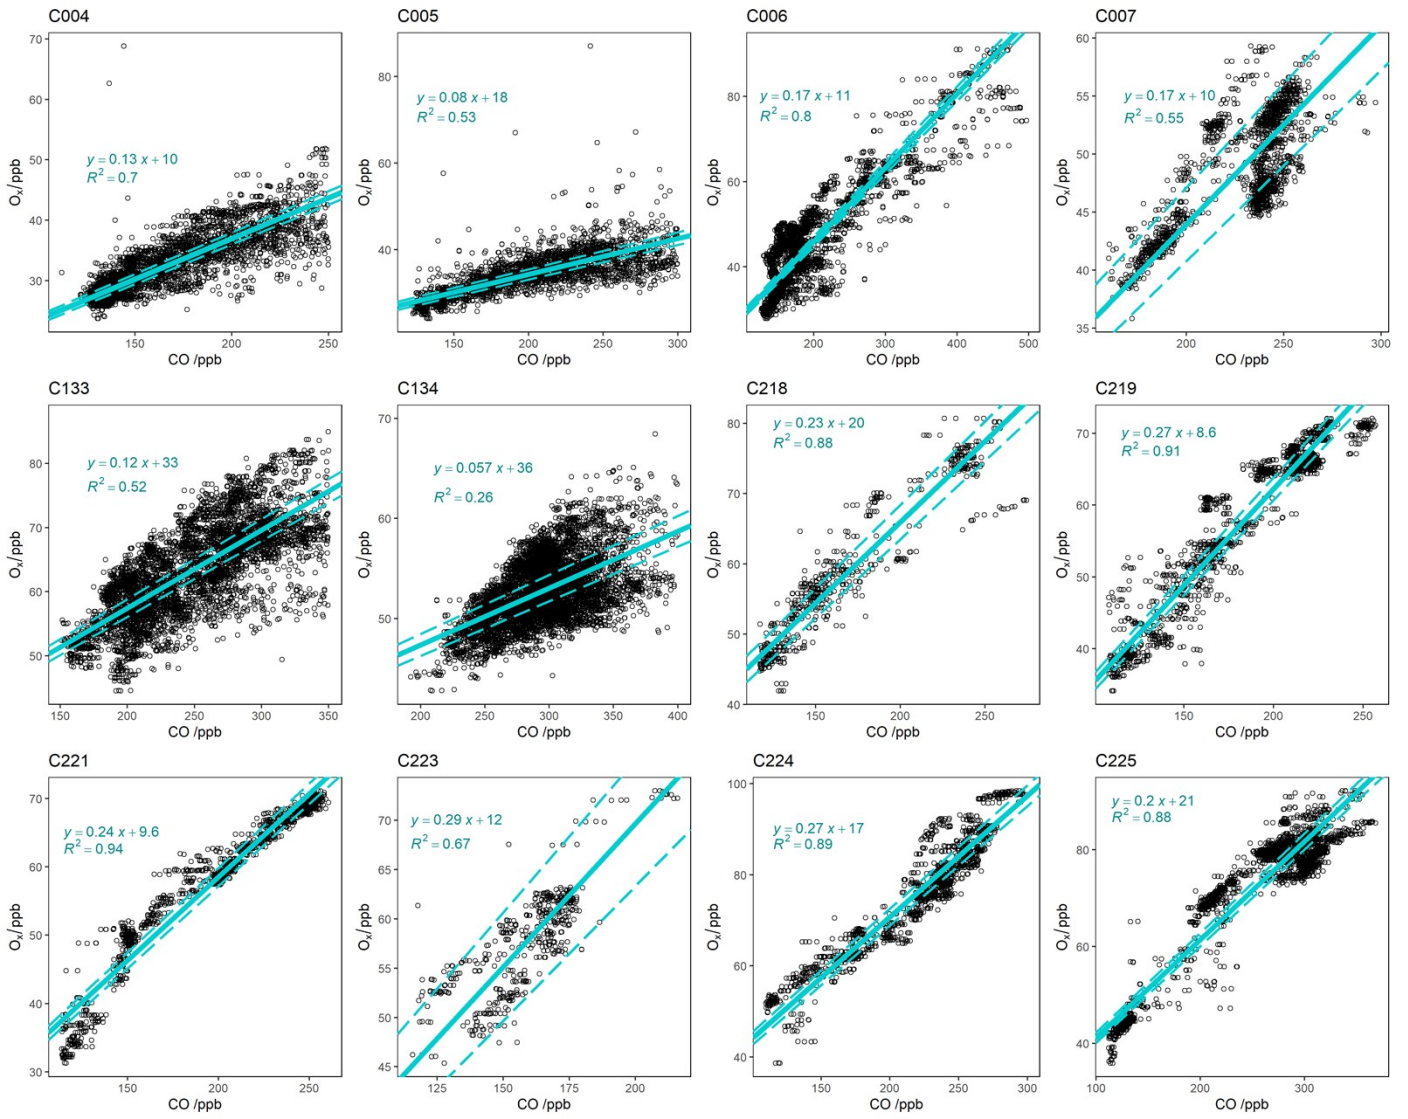

Figure S3: O<sub>x</sub> / CO scatter plots for periods in fires on each flight. The linear regression fit for each dataset was carried out using reduced major axis (RMA) regression.

| Flight number  | Benzene / ppbv | Toluene / ppbv | Toluene: Benzene | Calculated age / hrs |
|----------------|----------------|----------------|------------------|----------------------|
| MOYA-1 Haze    |                |                |                  |                      |
| C004           | 131.4          | 50.6           | 0.3849           | 5.1                  |
| C004           | 173.4          | 74.6           | 0.4301           | 0.9                  |
| C004           | 144.8          | 58.3           | 0.4027           | 3.4                  |
| C004           | 152.8          | 64.6           | 0.4224           | 1.6                  |
| C004           | 198.6          | 83.2           | 0.4192           | 1.9                  |
|                |                |                | <i>Average</i>   | <b>2.6</b>           |
|                |                |                |                  |                      |
| C005           | 44.8           | 19.1           | 0.4266           | 1.2                  |
| C005           | 66.0           | 28.1           | 0.4260           | 1.2                  |
| C005           | 175.9          | 74.6           | 0.4239           | 1.4                  |
|                |                |                | <i>Average</i>   | <b>1.3</b>           |
|                |                |                |                  |                      |
| MOYA-2 Haze    |                |                |                  |                      |
| c133           | 173.7          | 69.3           | 0.3990           | 3.7                  |
| c133           | 129.3          | 53.3           | 0.4118           | 2.5                  |
| c133           | 126.2          | 52.3           | 0.4144           | 2.3                  |
| c133           | 173.7          | 69.3           | 0.3990           | 3.7                  |
| c133           | 129.3          | 53.3           | 0.4118           | 2.5                  |
| c133           | 132.5          | 55.0           | 0.4151           | 2.2                  |
| c133           | 210.7          | 87.5           | 0.4153           | 2.2                  |
| c133           | 192.7          | 75.0           | 0.3892           | 4.7                  |
| c133           | 144.9          | 60.3           | 0.4161           | 2.1                  |
| c133           | 404.2          | 175.2          | 0.4334           | 0.6                  |
| c133           | 301.1          | 129.1          | 0.3677           | 4.1                  |
|                |                |                | <i>Average</i>   | <b>2.4</b>           |
|                |                |                |                  |                      |
| c134           | 140.3          | 60.4           | 0.4309           | 0.8                  |
| c134           | 305.5          | 130.6          | 0.4275           | 1.1                  |
| c134           | 268.6          | 115.0          | 0.4281           | 1.1                  |
|                |                |                | <i>Average</i>   | <b>1.0</b>           |
|                |                |                |                  |                      |
| MOYA-1 Ocean N |                |                |                  |                      |
| C006           | 101.4          | 35.4           |                  | 8.9                  |
| C006           | 88.3           | 28.1           |                  | 12.4                 |
| C006           | 180.1          | 54.6           |                  | 14.2                 |
| C006           | 42.8           | 15.5           |                  | 7.5                  |
| C006           | 35.2           | 10.2           |                  | 15.9                 |
|                |                |                | <i>Average</i>   | <b>11.8</b>          |
|                |                |                |                  |                      |
| MOYA-1 Ocean S |                |                |                  |                      |
| C007           | 90.4           | 25.8           |                  | 16.6                 |
| C007           | 55.8           | 15.6           |                  | 17.3                 |
| C007           | 41.4           | 11.7           |                  | 16.9                 |
|                |                |                | <i>Average</i>   | <b>16.9</b>          |

Table S1a: VOCs to calculate plume age (in hours) close to fires (MOYA 1 and 2 data) using benzene / toluene ratios

| Flight number | CO / ppb | Benzene / ppbv | Benzene : CO   | Calculated age / hrs |
|---------------|----------|----------------|----------------|----------------------|
| C219          | 169.5    | 49.7           | 0.00029        | 195.6                |
| C219          | 219.7    | 86.1           | 0.00039        | 149.4                |
| C219          | 222.2    | 76.3           | 0.00034        | 170.4                |
| C219          | 191.2    | 54.0           | 0.00028        | 201.6                |
| C219          | 209.0    | 66.4           | 0.00032        | 182.8                |
|               |          |                | <i>Average</i> | <b>179.9</b>         |
| C218          | 252.4    | 141.5          | 0.00056        | 92.3                 |
| C218          | 235.0    | 95.1           | 0.00040        | 144.3                |
| C218          | 173.9    | 53.7           | 0.00031        | 187.4                |
| C218          | 151.1    | 40.5           | 0.00027        | 210.0                |
| C218          | 139.5    | 26.7           | 0.00019        | 263.6                |
|               |          |                | <i>Average</i> | <b>201.3</b>         |
| C221          | 228.6    | 97.0           | 0.00042        | 136.6                |
| C221          | 96.3     | 35.8           | 0.00037        | 157.9                |
|               |          |                | <i>Average</i> | <b>147.2</b>         |
| C223          | 146.2    | 46.7           | 0.00032        | 182.0                |
| C223          | 225.6    | 85.1           | 0.00038        | 155.5                |
| C223          | 169.6    | 61.0           | 0.00036        | 163.0                |
|               |          |                | <i>Average</i> | <b>166.8</b>         |
| C224          | 238.5    | 92.9           | 0.00039        | 150.3                |
| C224          | 271.7    | 100.7          | 0.00037        | 158.3                |
| C224          | 287.1    | 114.1          | 0.00040        | 147.1                |
| C224          | 233.8    | 87.4           | 0.00037        | 156.8                |
| C224          | 243.9    | 84.1           | 0.00034        | 169.8                |
|               |          |                | <i>Average</i> | <b>156.5</b>         |
| C225          | 320.7    | 252.5          | 0.00079        | 38.1                 |
| C225          | 289.0    | 205.1          | 0.00071        | 54.7                 |
| C225          | 303.7    | 261.7          | 0.00086        | 23.7                 |
| C225          | 340.0    | 226.0          | 0.00066        | 65.1                 |
| C225          | 316.8    | 282.1          | 0.00089        | 18.5                 |
|               |          |                | <i>Average</i> | <b>40.0</b>          |

Table S1b: VOCs to calculate plume age (in hours) close to fires (ARNA) using benzene / CO ratios
